# Supplementary material
Source: PubMed Central journal article supplement (PMC5369669)
Supplement: PEDS_20162387SupplementaryData.pdf [file PEDS_20162387SupplementaryData.pdf]

## Supplemental Information

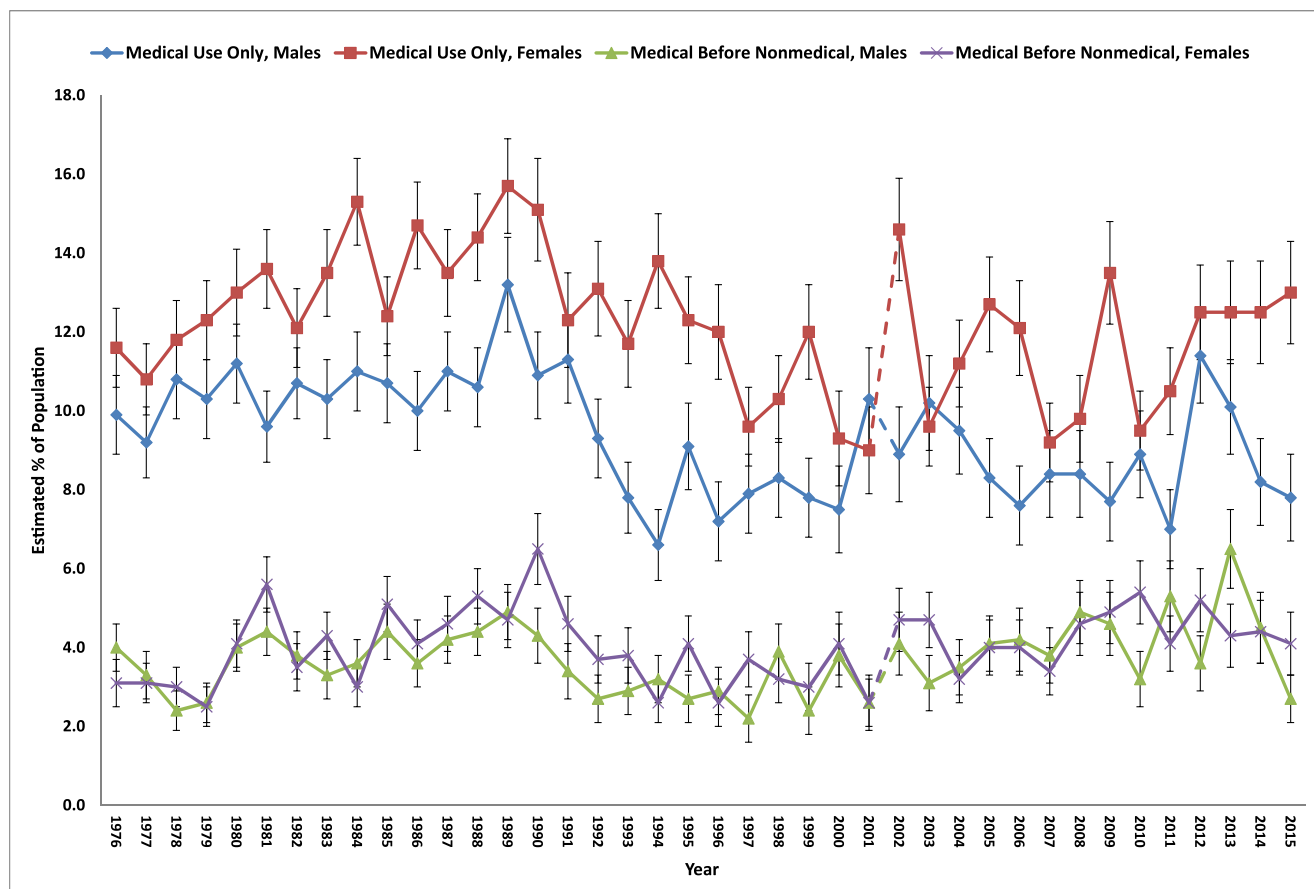

### SUPPLEMENTAL FIGURE 5

Trends in medical use only and medical use before nonmedical use of prescription opioids by sex, 1976–2015. The dotted line reflects the fact that the list of examples of prescription opioids was updated in 2002, which probably contributed to an increase in medical and nonmedical use of prescription opioids in 2002 (see the Measures section for details of the updates).

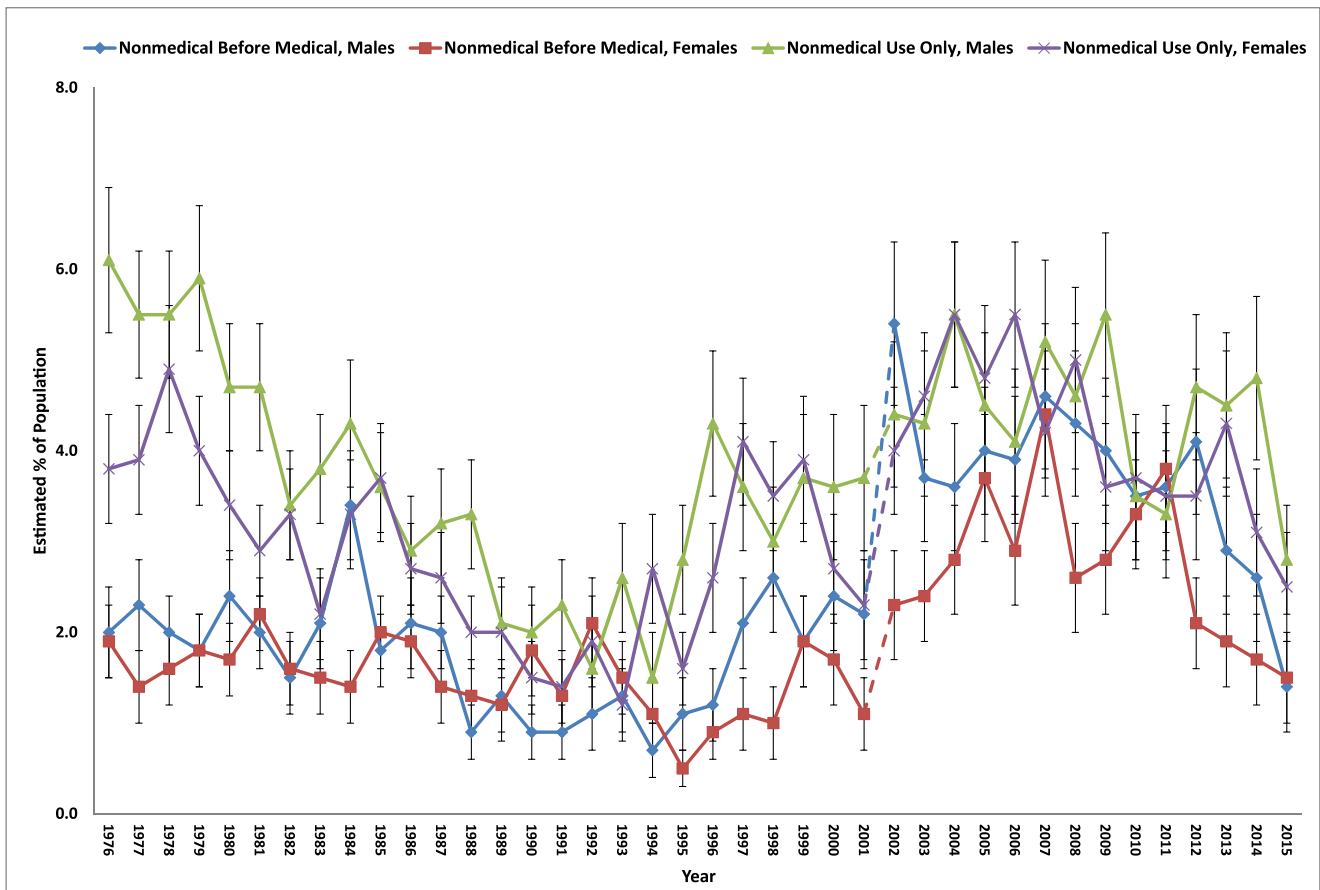

**SUPPLEMENTAL FIGURE 6**

Trends in lifetime nonmedical use before medical use and nonmedical use only of prescription opioids by sex, 1976–2015. The dotted line reflects the fact that the list of examples of prescription opioids was updated in 2002, which probably contributed to an increase in medical and nonmedical use of prescription opioids in 2002 (see the Measures section for details of the updates).
